# Supplementary material for: Preemptive targeted muscle reinnervation: the single incision approach should be avoided in trans-tibial traumatic amputation
Source: PubMed Central journal article supplement (PMC9590119; doi:10.1186/s40779-022-00421-z), 2022-10-24
Supplement: 40779_2022_421_MOESM2_ESM.pdf [file 40779_2022_421_MOESM2_ESM.pdf]

**Table S1** Comparison of the baseline characteristics, follow-up time and postoperative complications between two groups

| <b>Variable</b>                  | <b>TMR group</b><br><i>(n = 10 patients, 10 limbs)</i> | <b>Conventional amputation group</b><br><i>(n = 18 patients, 20 limbs)</i> | <b>P-value</b> |
|----------------------------------|--------------------------------------------------------|----------------------------------------------------------------------------|----------------|
| Age [years, median (IQR)]        | 37.0 (29.0 – 51.0)                                     | 30.0 (27.0 – 36.5)                                                         | 0.12           |
| Male [ <i>n</i> (%)]             | 8 (80.0)                                               | 18 (100.0)                                                                 |                |
| Injury mechanism [ <i>n</i> (%)] |                                                        |                                                                            | 0.88           |
| Crash                            | 7 (70.0)                                               | 14 (77.8)                                                                  |                |
| Ballistic trauma                 | 2 (20.0)                                               | 2 (11.0)                                                                   |                |
| Work accident                    | 0                                                      | 1 (5.6)                                                                    |                |
| Sports accident                  | 1 (10.0)                                               | 1 (5.6)                                                                    |                |
| Amputation level [ <i>n</i> (%)] |                                                        |                                                                            | 0.58           |
| Trans-tibial                     | 6 (60.0)                                               | 16 (80.0)                                                                  |                |
| Trans-femoral                    | 4 (40.0)                                               | 4 (20.0)                                                                   |                |
| Amputation type [ <i>n</i> (%)]  |                                                        |                                                                            | 0.73           |

| <b>Variable</b>                                  | <b>TMR group</b><br><i>(n = 10 patients, 10 limbs)</i> | <b>Conventional amputation group</b><br><i>(n = 18 patients, 20 limbs)</i> | <b><i>P</i>-value</b> |
|--------------------------------------------------|--------------------------------------------------------|----------------------------------------------------------------------------|-----------------------|
| Primary                                          | 7 (70.0)                                               | 17 (85.0)                                                                  |                       |
| Revision                                         | 3 (30.0)                                               | 3 (15.0)                                                                   |                       |
| Complications requiring revision [ <i>n</i> (%)] |                                                        |                                                                            | 0.70                  |
| Heterotopic ossification                         | 2 (20.0)                                               | 2 (10.0)                                                                   |                       |
| Unstable soft tissue coverage                    | 0                                                      | 4 (20.0)                                                                   |                       |
| Painful neuroma                                  | 2 (20.0)                                               | 2 (10.0)                                                                   |                       |
| Other                                            | 1 (10.0)                                               | 0                                                                          |                       |
| Follow-up time [months, median (IQR)]            | 14.5 (13.0 – 21.0)                                     | 26.0 (10.2 – 46.5)                                                         | 0.55                  |

Ten TMR patients included prospectively were compared to 18 conventional amputees – included retrospectively during the same period. The categorical variables were compared using the chi-square test or Fisher’s exact test. After testing for normality and equality of variances, the continuous variables were compared either by Student’s *t*-test or Wilcoxon’s rank-sum test. *TMR* targeted muscle reinnervation

**Table S2** Comparison of the NRS and PROMIS scores for RLP and PLP at the last follow-up between two groups [median (IQR)]

| <b>Variable</b> | <b>TMR group</b><br><b>(<i>n</i> = 10 patients, 10 limbs)</b> | <b>Conventional amputation group</b><br><b>(<i>n</i> = 18 patients, 20 limbs)</b> | <b><i>P</i>-value</b> |
|-----------------|---------------------------------------------------------------|-----------------------------------------------------------------------------------|-----------------------|
| NRS scores      |                                                               |                                                                                   |                       |
| Worst RLP       | 1.5 (0 – 4.7)                                                 | 3.0 (2.0 – 4.0)                                                                   | 0.61                  |
| Best RLP        | 0 (0 – 0)                                                     | 0 (0 – 2)                                                                         | 0.31                  |
| Current RLP     | 1 (0 – 2)                                                     | 0 (0 – 3)                                                                         | 0.96                  |
| Worst PLP       | 1.5 (0.2 – 5.0)                                               | 4.0 (0 – 5.7)                                                                     | 0.86                  |
| Best PLP        | 0 (0 – 0.7)                                                   | 0 (0 – 0.7)                                                                       | 0.83                  |
| Current PLP     | 0.5 (0 – 2.7)                                                 | 0 (0 – 2.0)                                                                       | 0.64                  |
| PROMIS scores   |                                                               |                                                                                   |                       |
| RLP intensity   | 36.3 (32.0 – 46.0)                                            | 46.3 (41.0 – 52.0)                                                                | 0.18                  |
| RLP quality     | 49.6 (43.0 – 53.0)                                            | 51.8 (46.0 – 56.0)                                                                | 0.60                  |
| RLP behavior    | 53.4 (43.0 – 55.0)                                            | 57.3 (49.0 – 61.0)                                                                | 0.31                  |

| <b>Variable</b>  | <b>TMR group</b><br><b>(n = 10 patients, 10 limbs)</b> | <b>Conventional amputation group</b><br><b>(n = 18 patients, 20 limbs)</b> | <b>P-value</b> |
|------------------|--------------------------------------------------------|----------------------------------------------------------------------------|----------------|
| RLP interference | 52.7 (48.0 – 57.0)                                     | 51.7 (41.0 – 61.0)                                                         | 0.85           |
| PLP intensity    | 41.8 (33.1 – 48.0)                                     | 47.8 (31.0 – 52.0)                                                         | 0.64           |
| PLP quality      | 49.6 (39.5 – 55.0)                                     | 49.6 (37.0 – 56.0)                                                         | 0.98           |
| PLP behavior     | 51.1 (36.0 – 54.0)                                     | 52.8 (34.0 – 57.0)                                                         | 0.66           |
| PLP interference | 49.9 (42.0 – 55.0)                                     | 40.7 (41.0 – 57.0)                                                         | 0.61           |

After testing for normality and equality of variances, these variables were compared either by Student's *t*-test or Wilcoxon's rank-sum test. *NRS* numerical rating scale, *PLP* phantom limb pain, *PROMIS* patient-reported outcomes measurement information system, *RLP* residual limb pain, *TMR* targeted muscle reinnervation
